# Supplementary material for: Treatment patterns, healthcare resource utilization, and costs in patients with moderate‐to‐severe psoriasis treated with systemic therapy in Japan: A retrospective claims database study
Source: PubMed Central journal article supplement (PMC9804179; doi:10.1111/1346-8138.16543), 2022-08-10
Supplement: JDE-49-1106-s001.pdf [file JDE-49-1106-s001.pdf]

## SUPPLEMENTARY MATERIAL

### SUPPLEMENTARY FIGURE 1 Study design

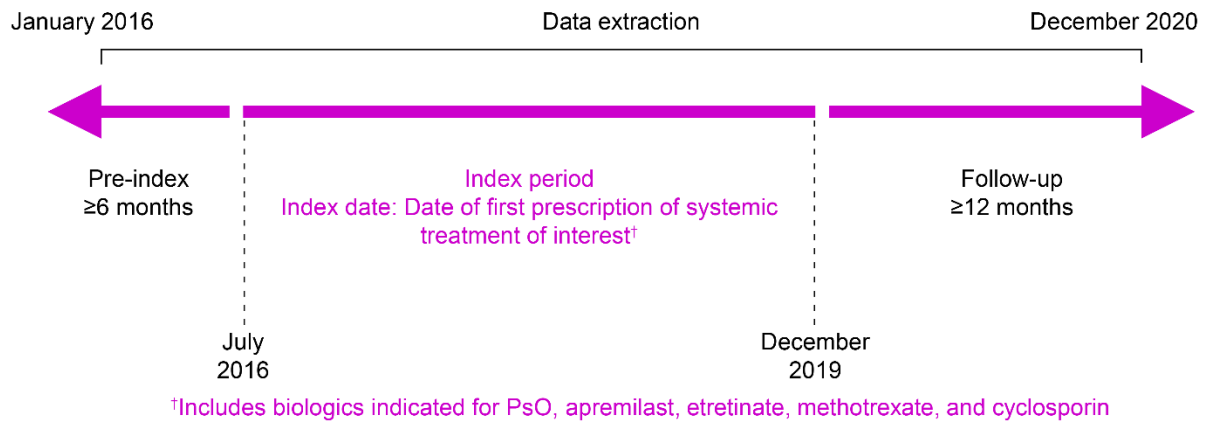

*PsO, psoriasis.*

**SUPPLEMENTARY TABLE 1** Systemic treatments of interest

| <b>Drug class</b>         | <b>Drug generic name</b>          | <b>Treatment interval, days<br/>(Upon maintenance dosing schedule)</b> |
|---------------------------|-----------------------------------|------------------------------------------------------------------------|
| <b>TNF inhibitor</b>      | Infliximab, including biosimilars | 56                                                                     |
|                           | Adalimumab, including biosimilars | 14                                                                     |
|                           | Certolizumab pegol                | 14                                                                     |
| <b>IL-12/23 inhibitor</b> | Ustekinumab                       | 84                                                                     |
| <b>IL-17 inhibitor</b>    | Secukinumab                       | 28                                                                     |
|                           | Ixekizumab                        | 28                                                                     |
|                           | Brodalumab                        | 14                                                                     |
| <b>IL-23 inhibitor</b>    | Guselkumab                        | 56                                                                     |
|                           | Risankizumab                      | 84                                                                     |
|                           | Tildrakizumab                     | 84                                                                     |
| <b>PDE-4 inhibitor</b>    | Apremilast                        | NA                                                                     |
| <b>Immunosuppressants</b> | Cyclosporin                       | NA                                                                     |
|                           | Methotrexate                      | NA                                                                     |
| <b>Vitamin A</b>          | Etretinate                        | NA                                                                     |

*IL, interleukin; NA, not applicable; PDE-4, phosphodiesterase-4; TNF, tumor necrosis factor.*
